# Supplementary material for: Lipid moieties on lipoproteins of commensal and non-commensal staphylococci induce differential immune responses
Source: PubMed Central journal article supplement (PMC5740139; doi:10.1038/s41467-017-02234-4), 2017-12-21
Supplement: 41467_2017_2234_MOESM1_ESM.pdf [file 41467_2017_2234_MOESM1_ESM.pdf]

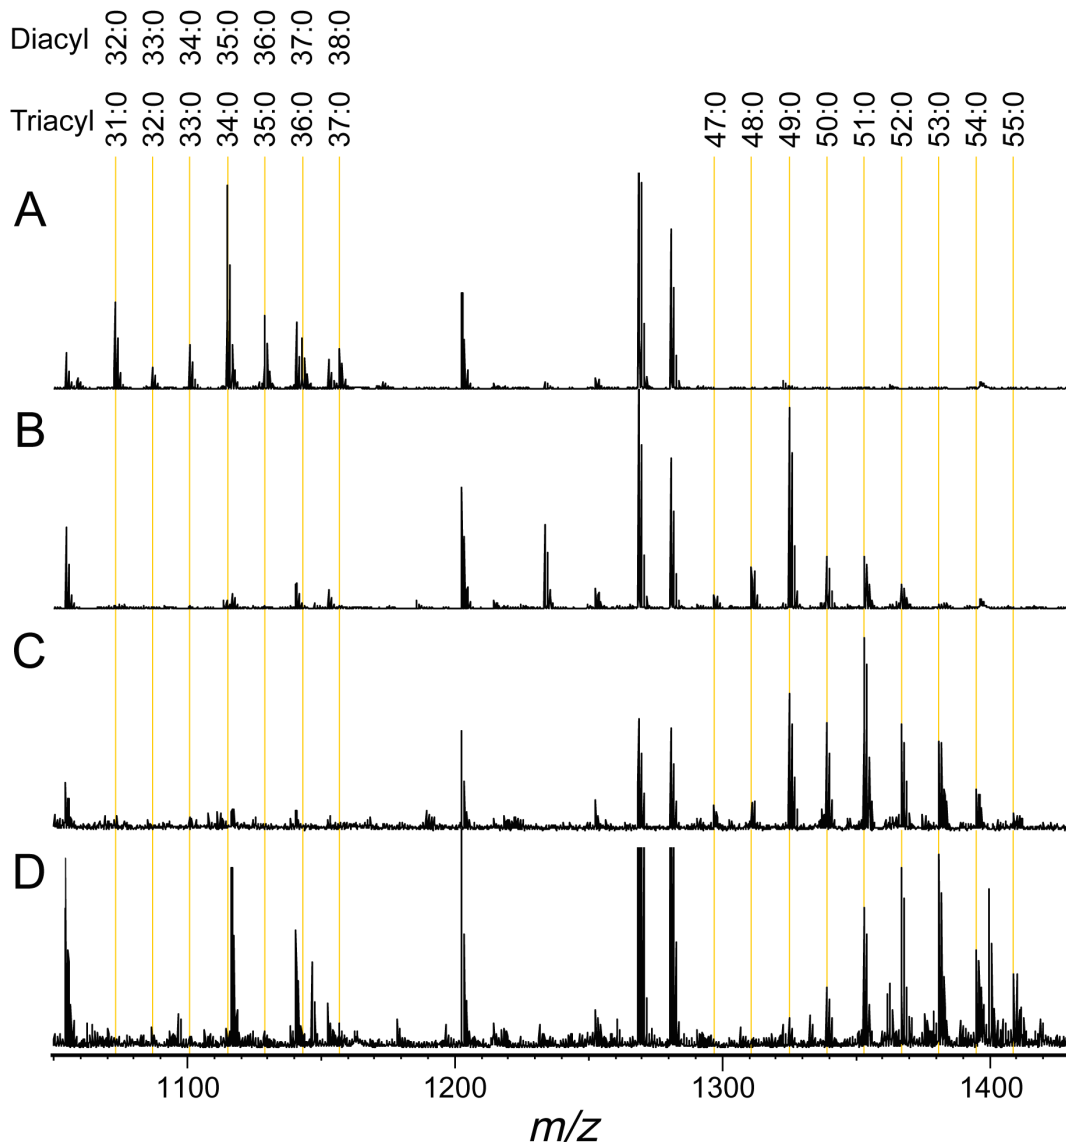

**Supplementary Figure 1. The mass distributions of the N-terminal tryptic peptides of the SitC proteins isolated from various staphylococci.** MALDI TOF MS spectra of in-gel tryptic digests of SitC-SC (A), SitC-SCInt (B), SitC-SA (C) and SitC-SE (D) are shown. The 14-Da mass differences in mass signals corresponding to methylene group are due to the *N*- and/or *O*-acylations with various lengths of fatty acids. The numbers of total carbon atoms and double bonds in fatty acyl groups of possible diacyl and triacyl lipopeptides are labelled. Peaks that are detected commonly between *m/z* 1200 and 1290 are SitC-derived non-lipidated peptides.

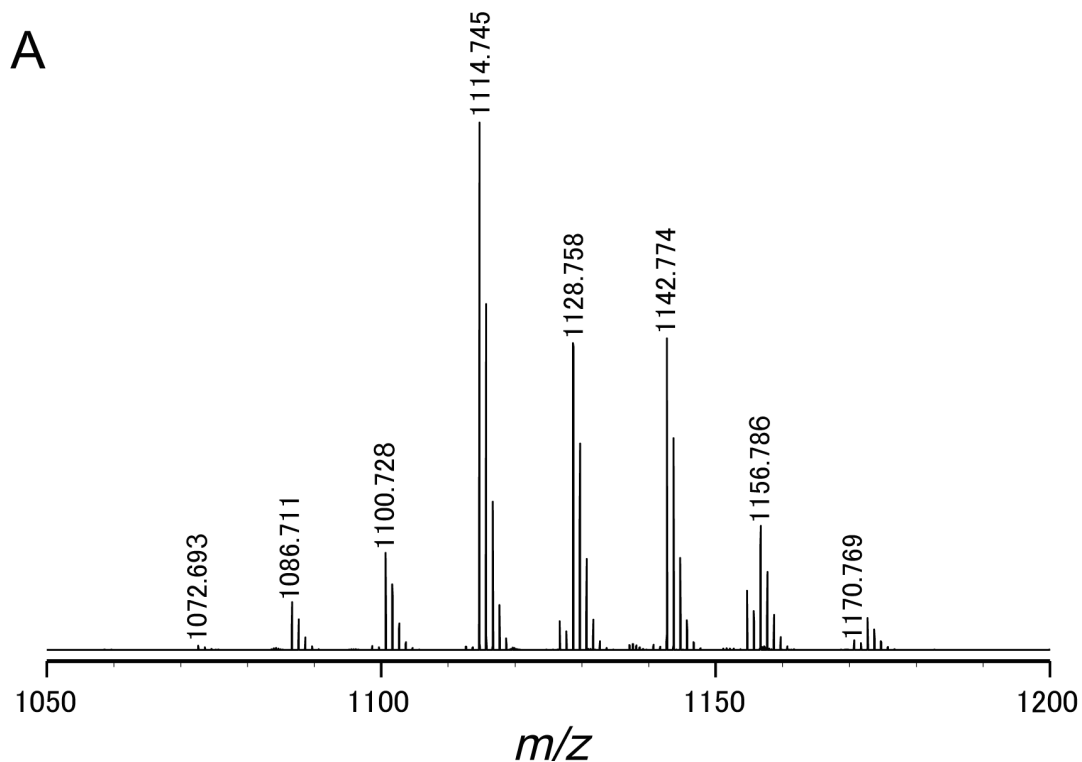

**B**

| Observed<br><i>m/z</i> | Diacyl           |                          |                         | Triacyl          |                          |                         |
|------------------------|------------------|--------------------------|-------------------------|------------------|--------------------------|-------------------------|
|                        | Carbon<br>number | Calculated<br><i>m/z</i> | relative<br>error (ppm) | Carbon<br>number | Calculated<br><i>m/z</i> | relative<br>error (ppm) |
| 1072.693               | 32               | 1072.731                 | -35                     | 31               | 1072.694                 | -1.4                    |
| 1086.711               | 33               | 1086.746                 | -32                     | 32               | 1086.710                 | 1.2                     |
| 1100.728               | 34               | 1100.762                 | -31                     | 33               | 1100.726                 | 2.1                     |
| 1114.745               | 35               | 1114.778                 | -29                     | 34               | 1114.741                 | 3.7                     |
| 1128.758               | 36               | 1128.793                 | -31                     | 35               | 1128.757                 | 1.3                     |
| 1142.774               | 37               | 1142.809                 | -30                     | 36               | 1142.773                 | 1.6                     |
| 1156.786               | 38               | 1156.825                 | -33                     | 37               | 1156.788                 | -2.0                    |
| 1170.769               | 39               | 1170.840                 | -61                     | 38               | 1170.804                 | -30                     |

**Supplementary Figure 2. The accurate mass measurement reveals the triacyl structure of SitC-SC. (A)** nLC-MS spectrum of the N-terminal lipopeptides of SitC-SC. **(B)** A table that represents observed and calculated mass values and assignments of the lipopeptide peaks detected in A. The mass errors indicate that those lipopeptides are triacylated.

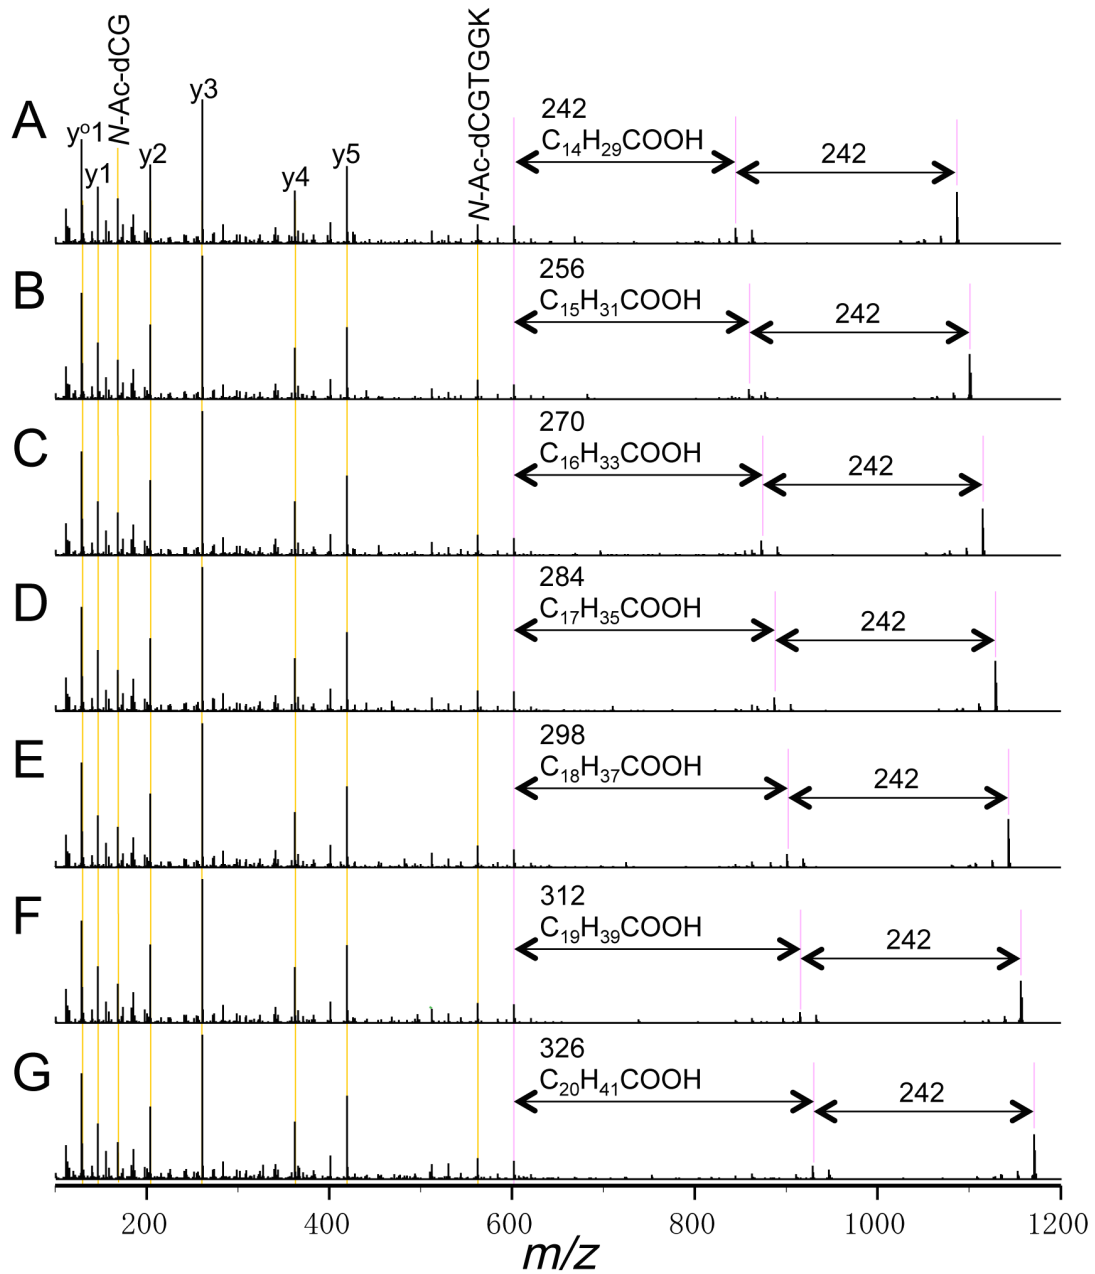

H

|              |
|--------------|
| $n=14$ ; 844 |
| 15; 858      |
| 16; 872      |
| 17; 886      |
| 18; 900      |
| 19; 914      |
| 20; 928      |

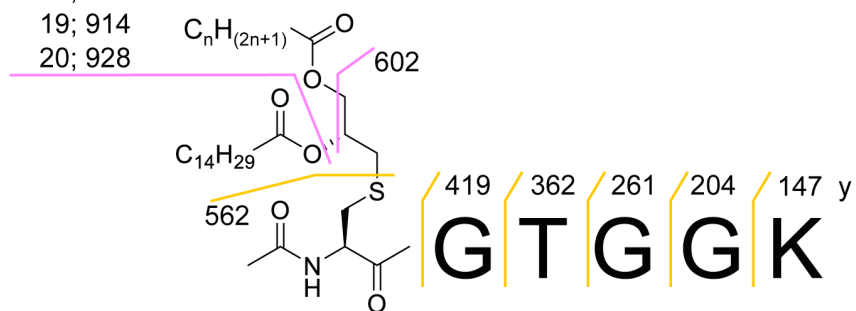

**Supplementary Figure 3. The lipid part of SitC-SC is  $\alpha$ N-acetylated.** nLC-MS/MS spectrum of the N-terminal lipopeptide of SitC-SC at  $m/z$  1086.7 **(A)**, 1100.7 **(B)**, 1114.7 **(C)**, 1128.8 **(D)**, 1142.8 **(E)**, 1156.8 **(F)** or 1170.8 **(G)** corresponding to triacyl forms (31:0, 32:0, 33:0, 34:0, 35:0, 36:0, 37:0 or 38:0 in total, respectively). **(H)** The elucidated  $\alpha$ N-acetyl structure of SitC-SC. The C-terminus-containing y-ion series that confirmed the GTGGK sequence and product ions that have lost pentadecanoic acid, two fatty acids or diacylpropanediols from the molecular ion are depicted in the spectra.  $y^0$  denotes dehydrated y ion. dC: dehydrocysteine.

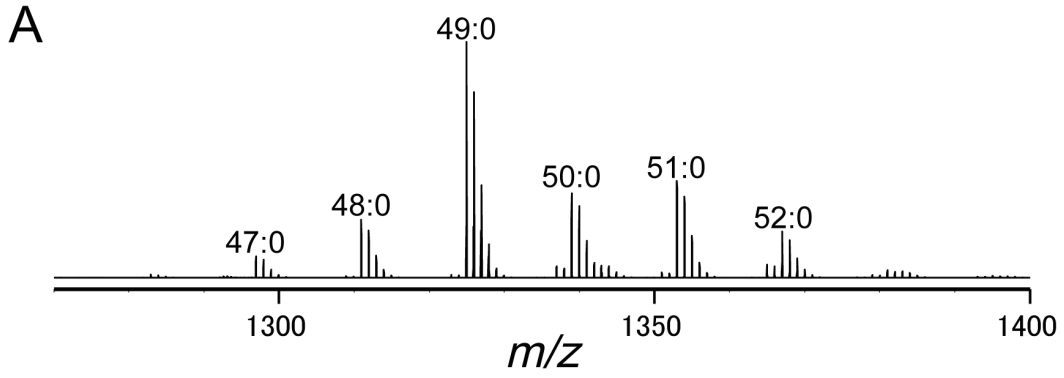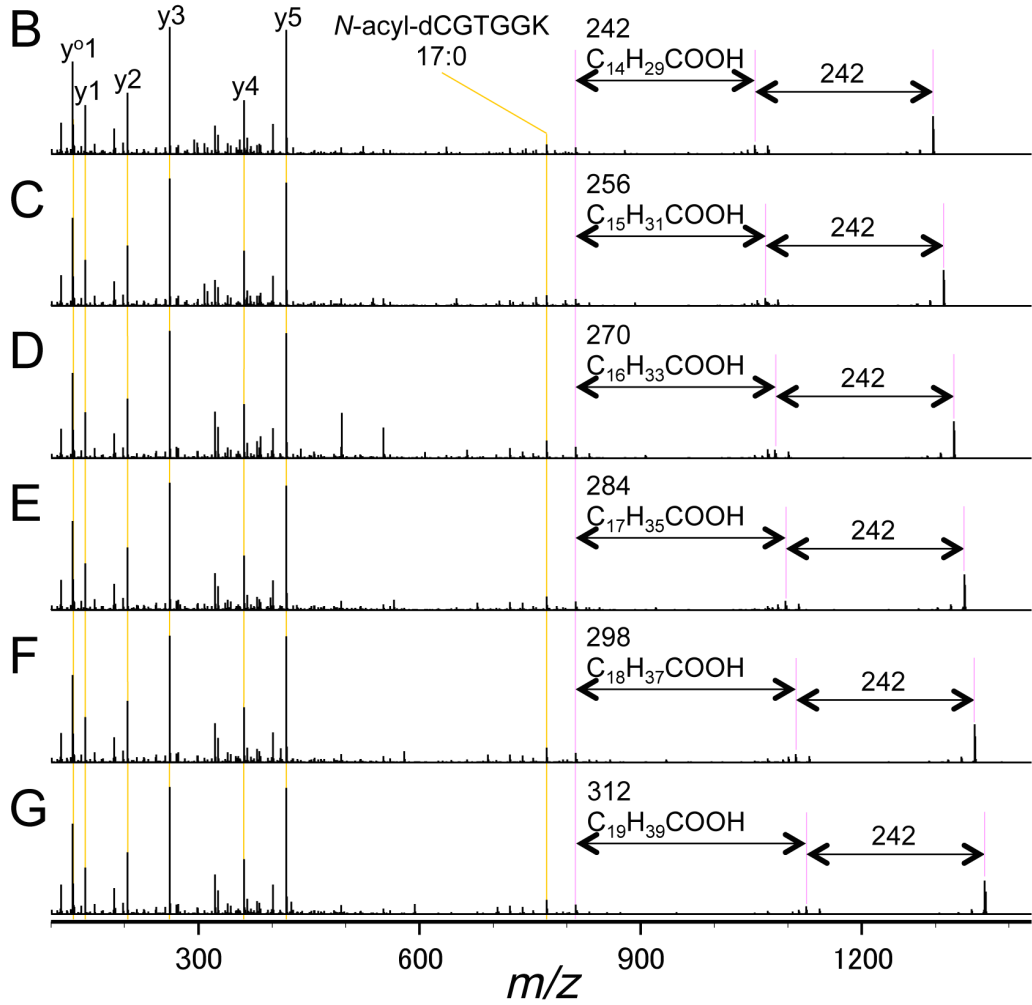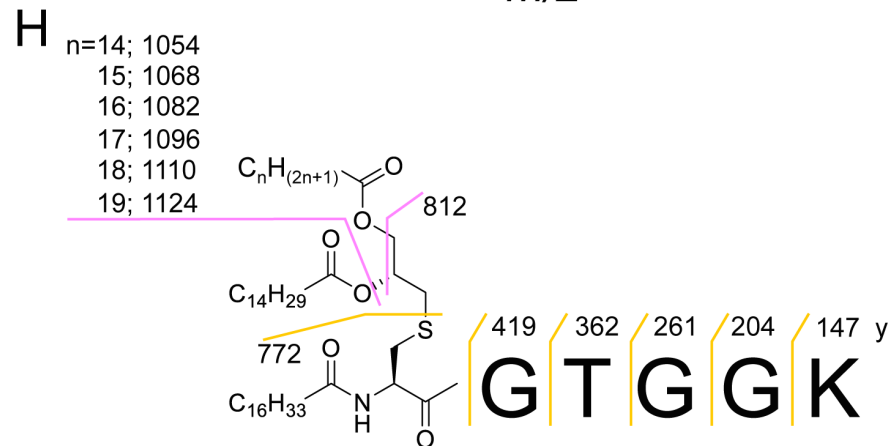

**Supplementary Figure 4. The SitC-SCInt is  $\alpha$ N-heptadecanoylated.** (A) nLC-MS spectrum of the N-terminal lipopeptide of SitC-SCInt. The major peaks of the lipopeptide are labelled with the total numbers of carbon atoms and double bonds of their fatty acyl groups. (B~G) nLC-MS/MS spectrum of each peak in A at  $m/z$  1296.9 (B), 1311.0 (C), 1325.0 (D), 1339.0 (E), 1353.0 (F) or 1367.0 (G) corresponding to triacyl form (47:0, 48:0, 49:0, 50:0, 51:0 or 52:0 in total, respectively) is shown. (H) The elucidated  $\alpha$ N-heptadecanoylated triacyl structure of SitC-SCInt. The C-terminus-containing  $y$ -ion series that confirmed the GTGGK sequence and product ions that have lost pentadecanoic acid, two fatty acids (30:0~35:0 in total) or diacylpropanediol from the molecular ion are depicted.  $y^o$  denotes dehydrated  $y$  ion. dC: dehydrocysteine.

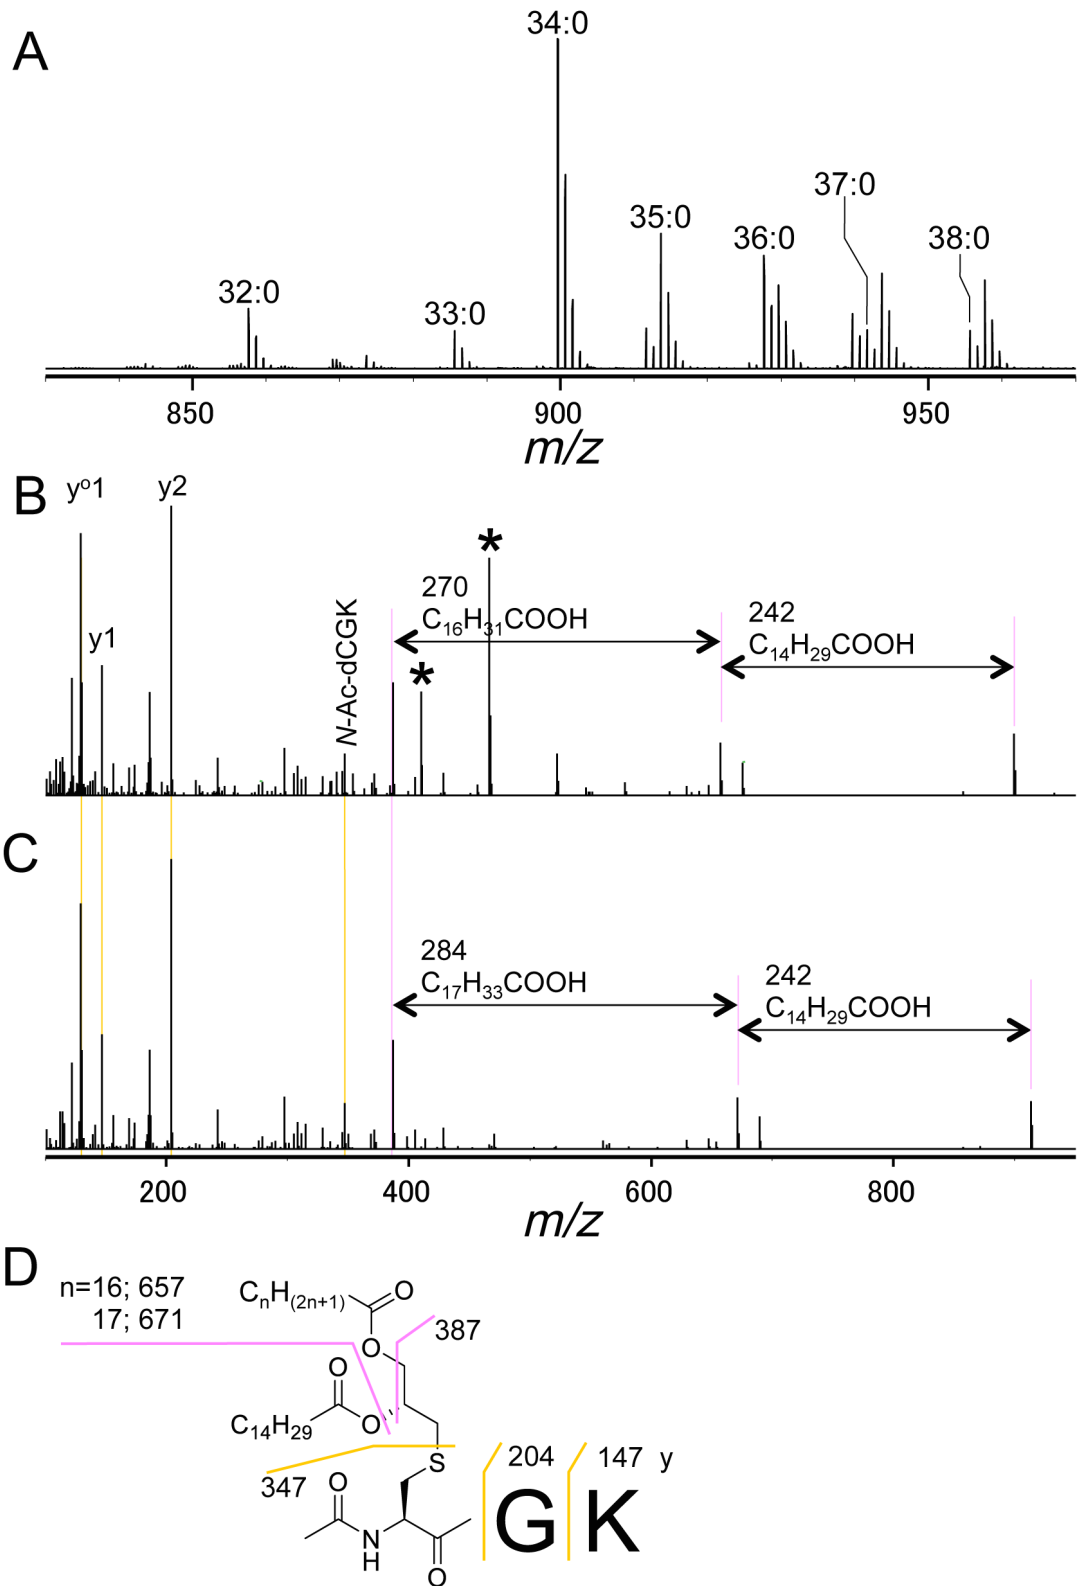

**Supplementary Figure 5. The Lpl1-SC protein is also  $\alpha$ N-acetylated. (A)** nLC-MS spectrum of the N-terminal lipopeptide of Lpl1-SC. Most intense peaks are identified as triacyl form based on the accurate mass measurement. Only the peak at  $m/z$  857.6 was diacylated. The total numbers

of carbon atoms and double bonds are marked in the figure. **(B,C)** The nLC-MS/MS spectrum of the peak at  $m/z$  899.65 **(B)** or 913.67 **(C)** corresponding to triacyl form (34:0 or 35:0 in total, respectively) is shown. **(D)** The elucidated  $\alpha N$ -acetyl structure of LpI1-SC. The C-terminus-containing  $y$ -ion series that confirmed the GK sequence and product ions that have lost pentadecanoic acid, two fatty acids (32:0 or 33:0 in total) or diacyl(32:0 or 33:0)propanediol from the molecular ion are depicted.  $y^o$  denotes dehydrated  $y$  ion. dC: dehydrocysteine. Asterisks denote contamination signals.



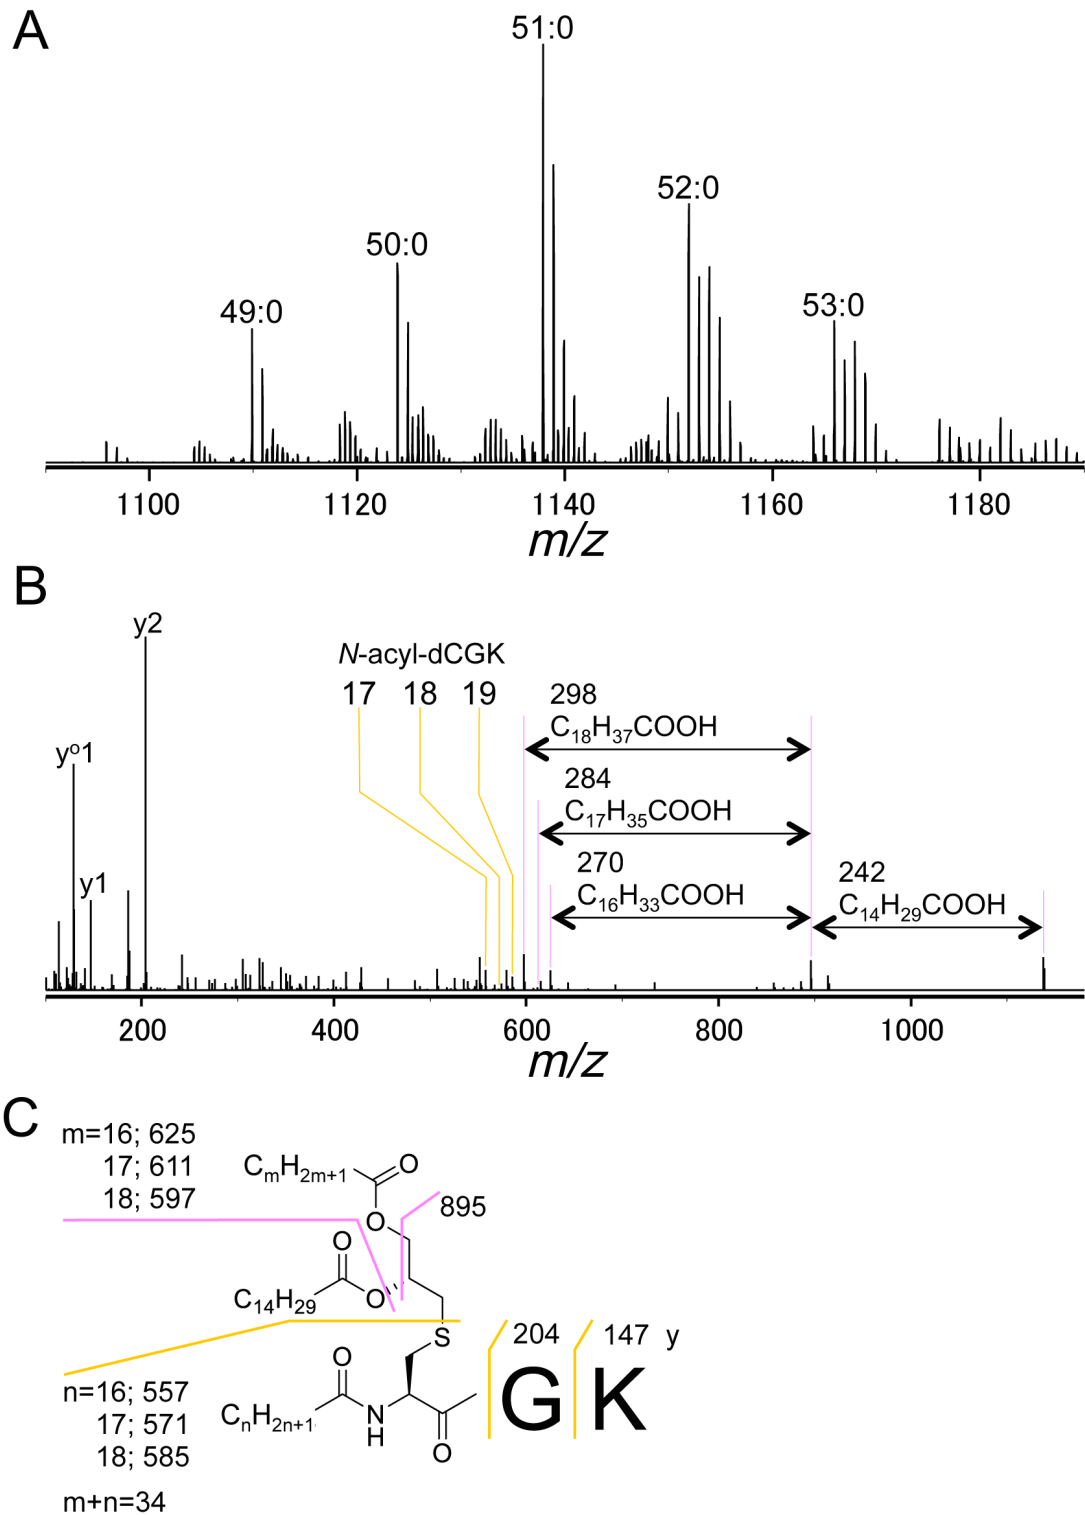

**Supplementary Figure 6. The Lpl1-SA protein is also  $\alpha$ N-long-chain-acylated. (A)** nLC-MS spectrum of the N-terminal lipopeptide of Lpl1-SA. The total numbers of carbon atoms and double bonds are marked in the figure. **(B)** The nLC-MS/MS spectrum of the peak at  $m/z$  1137.92 (51:0 in total) is shown.

**(C)** The elucidated  $\alpha N$ -long-chain-acyl structure of Lpl1-SA. The C-terminus-containing  $y$ -ion series that confirmed the GK sequence and product ions that have lost pentadecanoic acid, two fatty acids or diacylpropanediol from the molecular ion are depicted. Triacyl form acylated with 17:0-, 15:0- and 19:0-fatty acids at *sn*-1, *sn*-2 and  $\alpha$ -amino group, respectively, and that with 19:0, 15:0 and 17:0 are predominant molecular species.  $y^0$  denotes dehydrated  $y$  ion. dC: dehydrocysteine.

**Supplementary Table 1.** List of bacterial strains and plasmids used in the study

| Strains or plasmids         | Descriptions                                                          | Reference  |
|-----------------------------|-----------------------------------------------------------------------|------------|
| <b>Bacterial strains</b>    |                                                                       |            |
| <i>E. coli</i> BL21         | Laboratory strain                                                     |            |
| <i>S. carnosus</i> TM300    | Laboratory strain                                                     | 1          |
| <i>S. aureus</i> 113        | Mutant of RN1 (NTCC8325), $r^- m^-$ , $agr^-$ , $sigB^-$              | 2          |
| <i>S. aureus</i> HG003      | Mutant of strain RN1 (NTCC8325), <i>rsbU</i> & <i>tcaR</i> repaired   | 3          |
| <i>S. aureus</i> USA300 JE2 | Cured from the three plasmids present in the parent strain USA300 LAC | 4          |
| <i>S. epidermidis</i> O47   | Biofilm-forming clinical isolate                                      | 5          |
| <b>Plasmids</b>             |                                                                       |            |
| pCX30                       | Xylose inducible expression vector encoded a hybrid lipase-FnBPB      | 6          |
| pCX- <i>Int</i> -strep      | Express $Lnt^{E.c}$ under xylose inducible promoter                   | This study |
| pTX- <i>sitC</i> -his       | Express full length <i>SitC</i> -his under xylose inducible promoter  | 7          |

### Supplementary References

1. Rosenstein R, *et al.* Genome analysis of the meat starter culture bacterium *Staphylococcus carnosus* TM300. *Appl Environ Microbiol* **75**, 811-822 (2009).

2. Iordanescu S, Surdeanu M. Two restriction and modification systems in *Staphylococcus aureus* NCTC8325. *J Gen Microbiol* **96**, 277-281 (1976).
3. Herbert S, *et al.* Repair of global regulators in *Staphylococcus aureus* 8325 and comparative analysis with other clinical isolates. *Infect Immun* **78**, 2877-2889 (2010).
4. Diep BA, *et al.* Complete genome sequence of USA300, an epidemic clone of community-acquired methicillin-resistant *Staphylococcus aureus*. *Lancet* **367**, 731-739 (2006).
5. Heilmann C, Gerke C, Perdreau-Remington F, Götz F. Characterization of Tn917 insertion mutants of *Staphylococcus epidermidis* affected in biofilm formation. *Infect Immun* **64**, 277-282 (1996).
6. Strauss A, Götz F. In vivo immobilization of enzymatically active polypeptides on the cell surface of *Staphylococcus carnosus*. *Mol Microbiol* **21**, 491-500 (1996).
7. Müller P, *et al.* The *Staphylococcus aureus* lipoprotein SitC colocalizes with Toll-like receptor 2 (TLR2) in murine keratinocytes and elicits intracellular TLR2 accumulation. *Infect Immun* **78**, 4243-4250 (2010).
